# Supplementary material for: Exquisitely Constructing a Robust MOF with Dual Pore Sizes for Efficient CO2 Capture
Source: MDPI journal article supplement (doi:10.3390/molecules28176276), 2023-08-28
Supplement: s1 [file s1]

# Exquisitely Constructing a Robust MOF with Dual Pore Sizes for Efficient CO<sub>2</sub> Capture

Yanxi Li <sup>1,\*</sup>, Yuhua Bai <sup>1,2</sup>, Zhuozheng Wang <sup>1</sup>, Qihan Gong <sup>1,\*</sup>, Mengchen Li <sup>1</sup>, Yawen Bo <sup>1</sup>, Hua Xu <sup>1</sup>, Guiyuan Jiang <sup>2</sup> and Kebin Chi <sup>1,\*</sup>

<sup>1</sup> CNPC Petrochemical Research Institute Company Limited, Beijing 102206, China;  
limengchen@petrochina.com.cn (M.L.)

<sup>2</sup> College of Chemical Engineering and Environment, China University of Petroleum-Beijing,  
Beijing 102249, China

\* Correspondence: liyanxi@petrochina.com.cn (Y.L.); gongqihan@petrochina.com.cn (Q.G.);  
ckb459@petrochina.com.cn (K.C.)

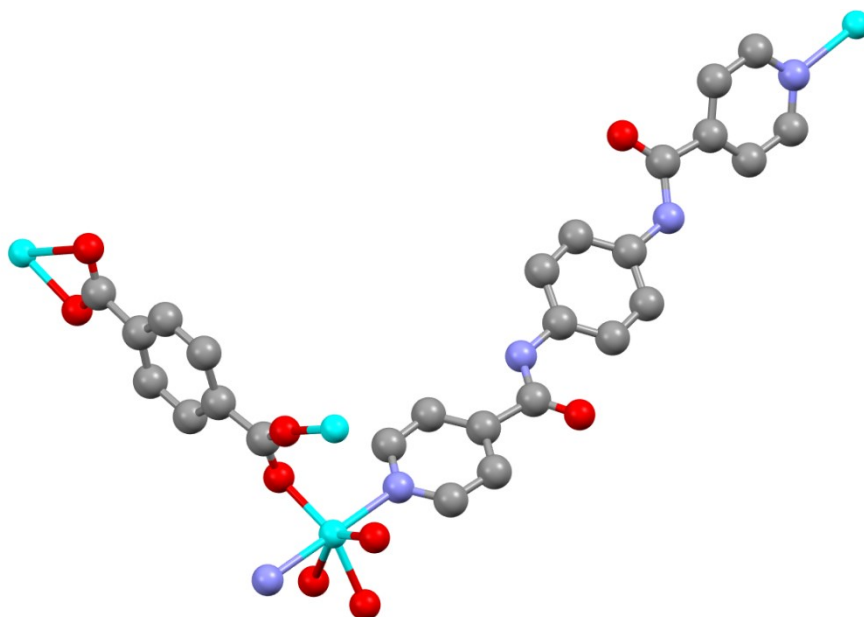

**Figure S1.** The asymmetric unit of PRI-1. Cu, C, N, O atoms are in cyan, grey, blue, and red, respectively.

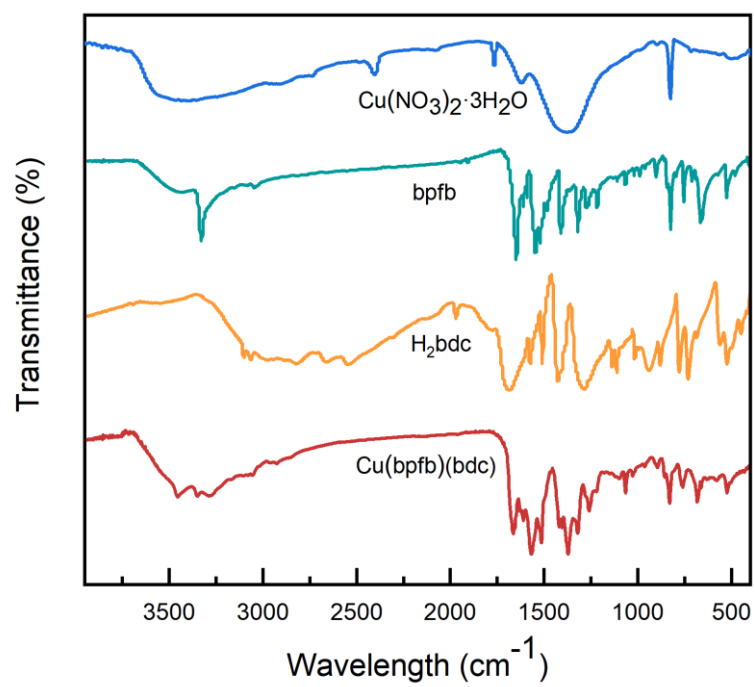

**Figure S2.** The FT-IR spectra of PRI-1 and raw materials.

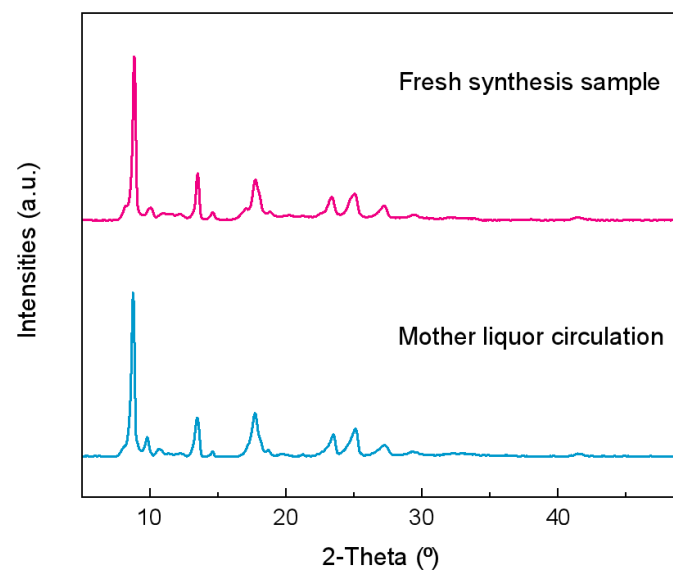

**Figure S3.** PXRD patterns of PRI-1 samples from the fresh synthesis and Mother liquor circulation synthesized method.

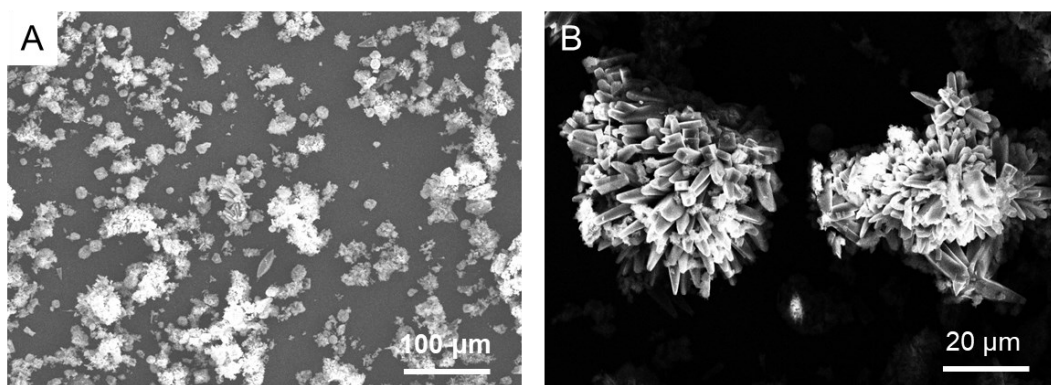

**Figure S4.** SEM pictures of PRI.

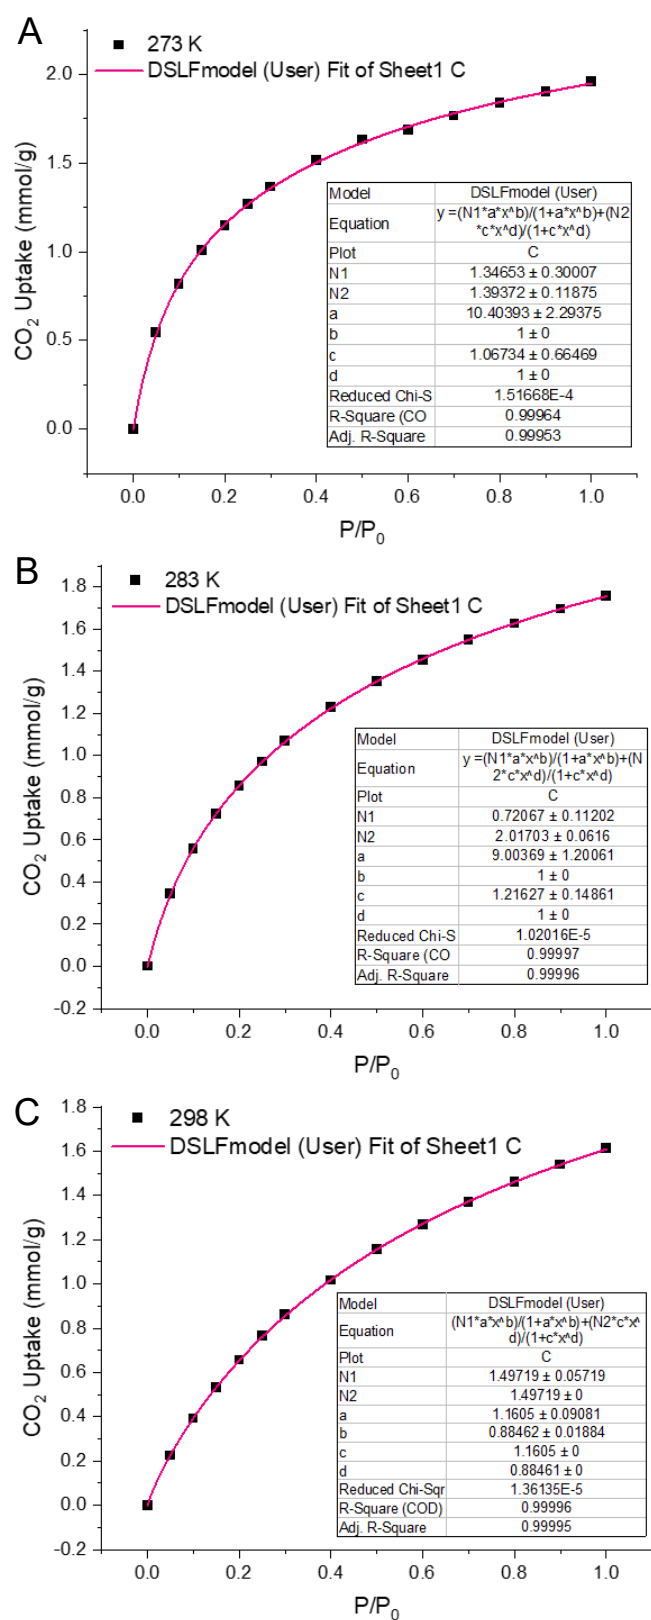

**Figure S5.** Gas adsorption isotherm of CO<sub>2</sub> with the DSLF fit for PRI-1 at 273, 283 and 298 K.

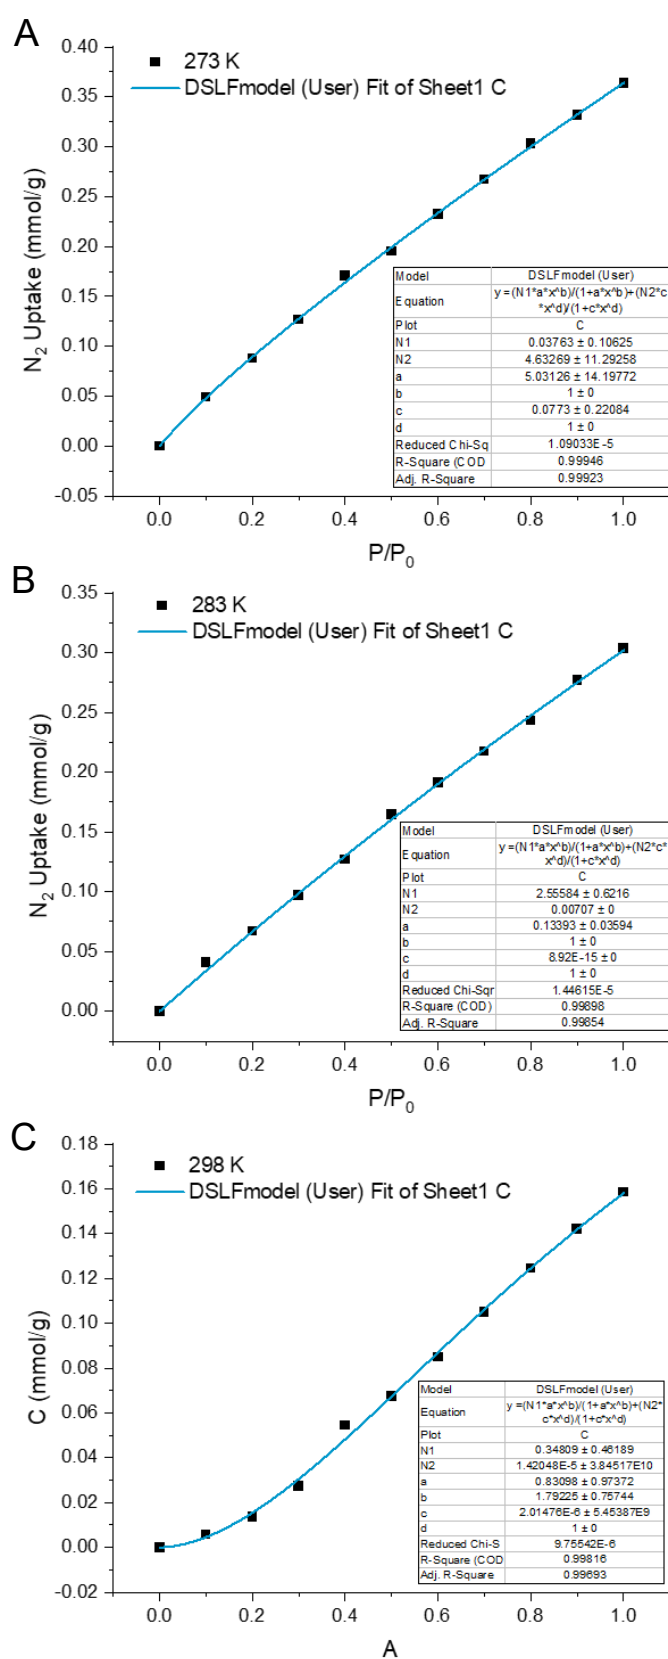

**Figure S6.** Gas adsorption isotherm of  $N_2$  with the DSLF fit for PRI-1 at 273, 283 and 298 K.

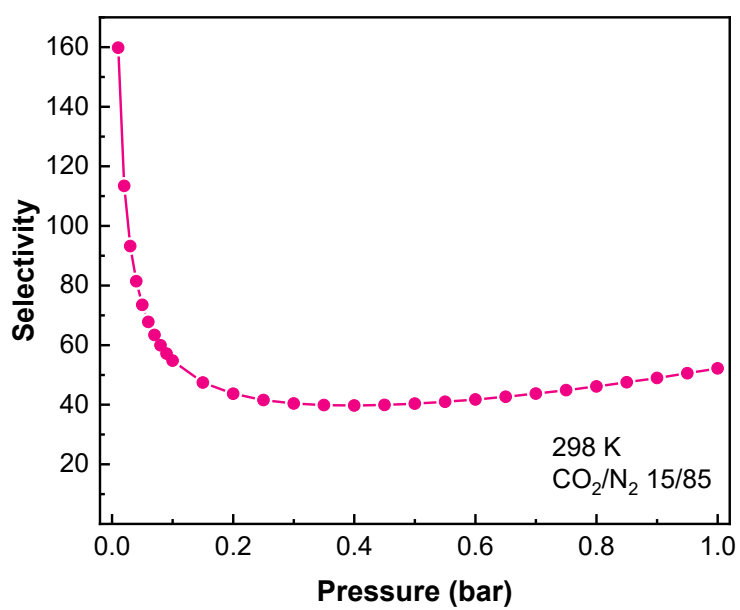

**Figure S7.** IAST selectivity of PRI-1 for CO<sub>2</sub>/N<sub>2</sub> (15:85) at 298 K.



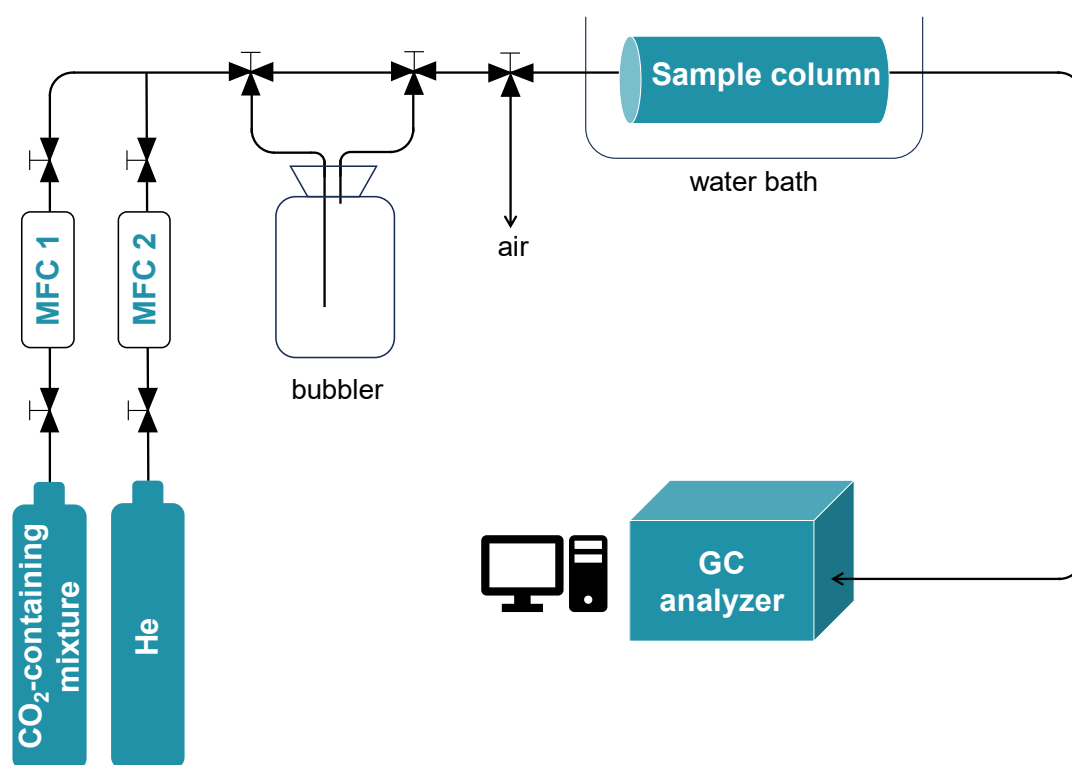

**Figure S8.** Diagram of the home-made dynamic breakthrough experimental apparatus.
